# Supplementary material for: Surface charge influences protein corona, cell uptake and biological effects of carbon dots
Source: Royal Society of Chemistry journal article supplement (doi:10.1039/d2nr03611h), 2022-01-01
Supplement: d2nr03611h1.pdf [file d2nr03611h1.pdf]

## Supporting Information

### Surface Charge Influences Protein Corona, Cell Uptake and Biological Effects of Carbon Dots

Yasmin Arezki, François Delalande, Christine Schaeffer-Reiss, Sarah Cianférani, Mickaël Rapp, Luc Lebeau, Françoise Pons, Carole Ronzani\*

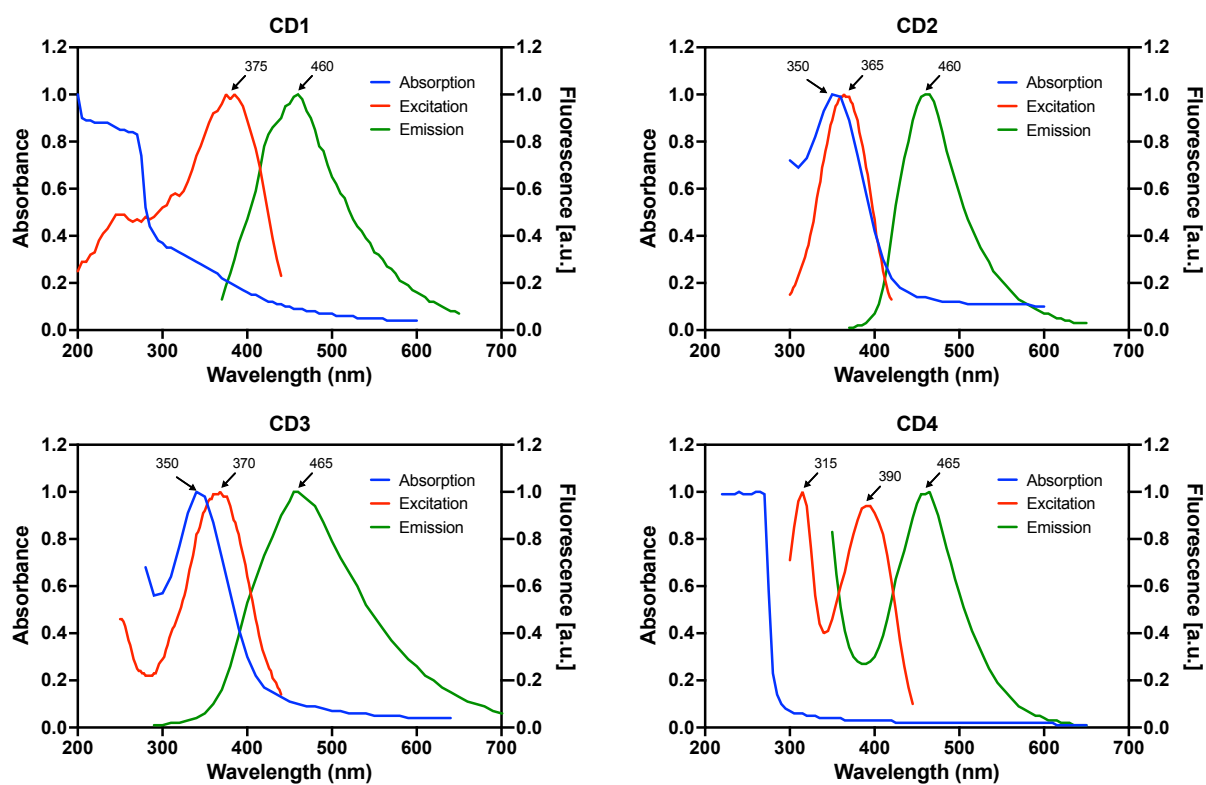

Figure S1. Optical properties of the CDs: absorption (blue), excitation (red), and emission (green; excitation at 375, 365, 370 and 315 nm for CD1, CD2, CD3 and CD4, respectively) normalized spectra.

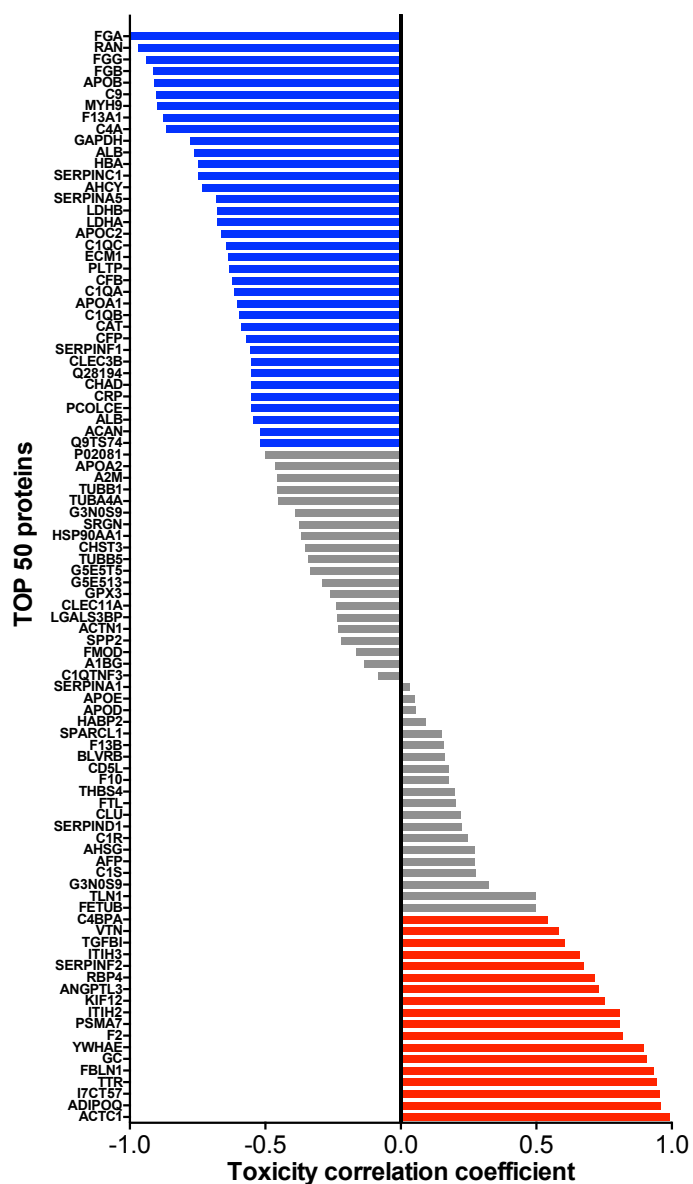

**Figure S2.** Correlation between the abundance (riBAQ) of the top 50 proteins and the CD1-CD4 toxicity. The toxicity marker that was chosen is the loss of viability induced by 125  $\mu\text{g}/\text{mL}$  CDs. The toxicity correlation coefficient is considered as significant when the absolute value is  $> 0.5$  (labelled in blue and red for negative or positive correlation, respectively).

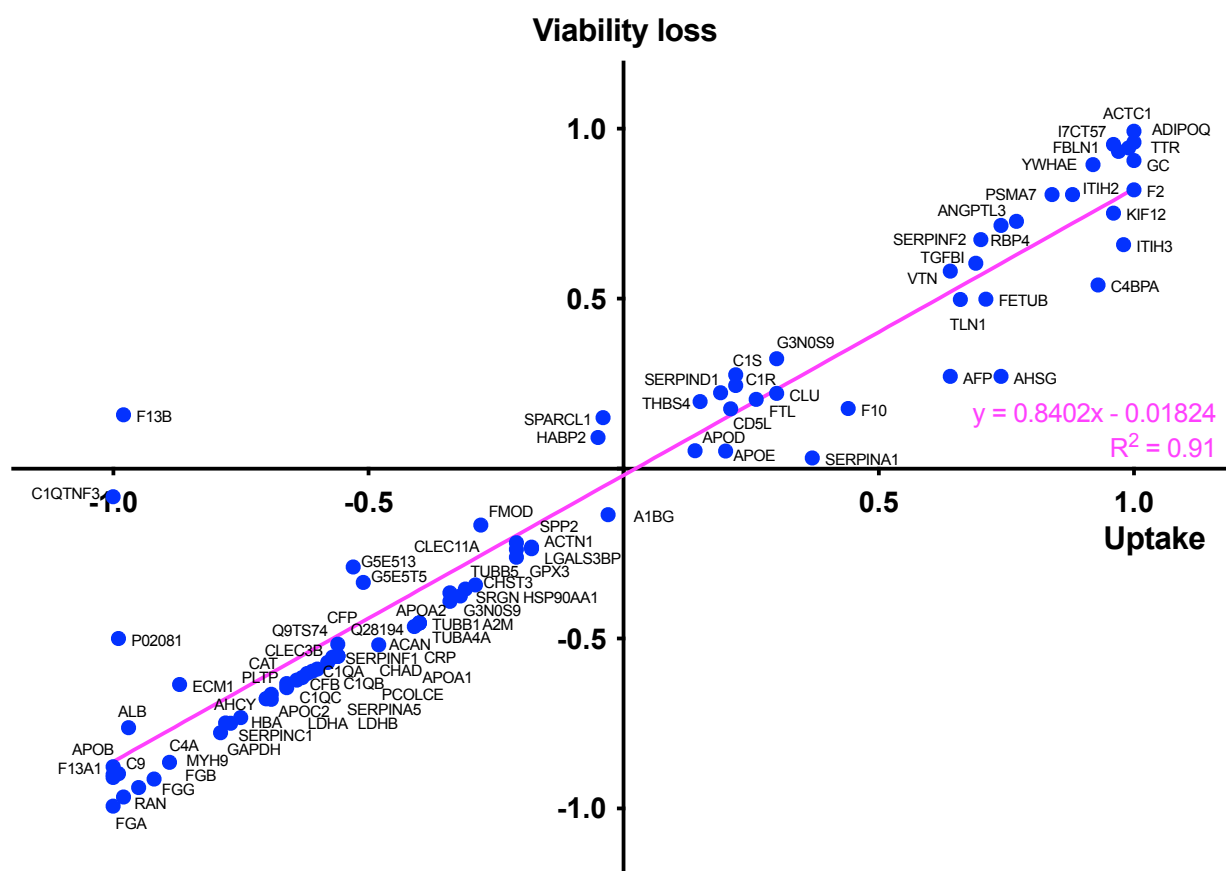

**Figure S3.** Role of corona proteins in CD cytotoxicity. Correlation between CD uptake and macrophage viability loss induced by 125 µg/mL CDs depending on each top 50 protein present in the NP corona. This analysis was conducted using FACS uptake data for cells exposed to CD2, CD3 and CD4.

## ARTICLE

Table S1. Top 50 most abundant proteins in the CD corona.

| CD1 | Gene name | Protein name                                          | RIBAQ  | Contribution (%) | CD2 | Gene name | Protein name                                          | RIBAQ  | Contribution (%) |
|-----|-----------|-------------------------------------------------------|--------|------------------|-----|-----------|-------------------------------------------------------|--------|------------------|
| 1   | ITIH3     | Inter-alpha-trypsin inhibitor heavy chain H3          | 0.1435 | 14.435           | 1   | AHSG      | Alpha-2-HS-glycoprotein                               | 0.1238 | 12.448           |
| 2   | KIF12     | Protein AMBP                                          | 0.1180 | 11.874           | 2   | ADIPOQ    | Adiponectin                                           | 0.1203 | 12.097           |
| 3   | VTN       | Vitronectin                                           | 0.1130 | 11.373           | 3   | VTN       | Vitronectin                                           | 0.0903 | 9.082            |
| 4   | FBLN1     | Fibulin-1                                             | 0.0475 | 4.780            | 4   | KIF12     | Protein AMBP                                          | 0.0882 | 8.871            |
| 5   | ADIPOQ    | Adiponectin                                           | 0.0358 | 3.600            | 5   | ITIH3     | Inter-alpha-trypsin inhibitor heavy chain H3          | 0.0841 | 8.461            |
| 6   | AHSG      | Alpha-2-HS-glycoprotein                               | 0.0352 | 3.545            | 6   | FBLN1     | Fibulin-1                                             | 0.0579 | 5.818            |
| 7   | HBA       | Hemoglobin subunit alpha                              | 0.0346 | 3.482            | 7   | SERPINA1  | Alpha-1-antitrypsinase                                | 0.0435 | 4.376            |
| 8   | G3NOS9    | Uncharacterized protein                               | 0.0282 | 2.835            | 8   | G3NOS9    | Uncharacterized protein                               | 0.0343 | 3.445            |
| 9   | F2        | Prothrombin                                           | 0.0240 | 2.411            | 9   | APOE      | Apolipoprotein E                                      | 0.0234 | 2.356            |
| 10  | LGALS3BP  | Galectin-3-binding protein                            | 0.0196 | 1.969            | 10  | F2        | Prothrombin                                           | 0.0215 | 2.159            |
| 11  | SERPINC1  | Antithrombin-III                                      | 0.0180 | 1.812            | 11  | APOA1     | Apolipoprotein A-I                                    | 0.0183 | 1.840            |
| 12  | APOA1     | Apolipoprotein A-I                                    | 0.0179 | 1.803            | 12  | LGALS3BP  | Galectin-3-binding protein                            | 0.0171 | 1.717            |
| 13  | SERPINA1  | Alpha-1-antitrypsinase                                | 0.0161 | 1.620            | 13  | SERPINC1  | Antithrombin-III                                      | 0.0156 | 1.565            |
| 14  | P02081    | Hemoglobin fetal subunit beta                         | 0.0159 | 1.597            | 14  | FETUB     | Fetuin-B                                              | 0.0119 | 1.200            |
| 15  | G5E5T5    | Uncharacterized protein                               | 0.0157 | 1.575            | 15  | HBA       | Hemoglobin subunit alpha                              | 0.0109 | 1.093            |
| 16  | GAPDH     | Glyceraldehyde-3-phosphate dehydrogenase (GAPDH)      | 0.0101 | 1.017            | 16  | ALB       | Serum albumin                                         | 0.0083 | 0.832            |
| 17  | APOE      | Apolipoprotein E                                      | 0.0099 | 0.991            | 17  | ALB       | ALB protein                                           | 0.0079 | 0.799            |
| 18  | G5E513    | Uncharacterized protein                               | 0.0091 | 0.921            | 18  | TUBB1     | Tubulin beta chain                                    | 0.0076 | 0.768            |
| 19  | CLEC11A   | C-type lectin domain containing 11A                   | 0.0077 | 0.778            | 19  | G5E5T5    | Uncharacterized protein                               | 0.0071 | 0.710            |
| 20  | SERPIND1  | SERPIND1 protein                                      | 0.0075 | 0.753            | 20  | AFP       | Alpha-fetoprotein                                     | 0.0070 | 0.705            |
| 21  | TUBB1     | Tubulin beta chain                                    | 0.0071 | 0.713            | 21  | SERPINF2  | Alpha-2-antiplasmin                                   | 0.0069 | 0.695            |
| 22  | F10       | F10 protein                                           | 0.0069 | 0.697            | 22  | F13A1     | Coagulation factor XIII A chain                       | 0.0061 | 0.609            |
| 23  | A2M       | Alpha-2-macroglobulin                                 | 0.0066 | 0.665            | 23  | ITIH2     | ITIH2 protein                                         | 0.0057 | 0.572            |
| 24  | ITIH2     | ITIH2 protein                                         | 0.0059 | 0.590            | 24  | GAPDH     | Glyceraldehyde-3-phosphate dehydrogenase (GAPDH)      | 0.0056 | 0.565            |
| 25  | F13A1     | Coagulation factor XIII A chain                       | 0.0058 | 0.583            | 25  | CLEC11A   | C-type lectin domain containing 11A                   | 0.0046 | 0.465            |
| 26  | SPARCL1   | SPARC like 1                                          | 0.0054 | 0.547            | 26  | ECM1      | ECM1 protein                                          | 0.0043 | 0.436            |
| 27  | ALB       | ALB protein                                           | 0.0054 | 0.544            | 27  | SERPIND1  | SERPIND1 protein                                      | 0.0043 | 0.429            |
| 28  | ALB       | Serum albumin                                         | 0.0053 | 0.534            | 28  | G5E513    | Uncharacterized protein                               | 0.0041 | 0.414            |
| 29  | HABP2     | Hyaluronan-binding protein 2                          | 0.0052 | 0.521            | 29  | TGFB1     | Transforming growth factor-beta-induced protein ig-h3 | 0.0040 | 0.400            |
| 30  | SERPINF2  | Alpha-2-antiplasmin                                   | 0.0051 | 0.515            | 30  | CLU       | Clusterin                                             | 0.0039 | 0.395            |
| 31  | TGFB1     | Transforming growth factor-beta-induced protein ig-h3 | 0.0048 | 0.485            | 31  | A2M       | Alpha-2-macroglobulin                                 | 0.0037 | 0.376            |
| 32  | HSP90AA1  | Heat shock protein HSP 90-alpha                       | 0.0045 | 0.456            | 32  | TTR       | Transthyretin                                         | 0.0035 | 0.357            |
| 33  | E1B102    | Fibromodulin                                          | 0.0043 | 0.434            | 33  | GC        | Vitamin D-binding protein                             | 0.0033 | 0.337            |
| 34  | C4A       | Uncharacterized protein                               | 0.0038 | 0.387            | 34  | C4BPA     | Complement component 4 binding protein. alpha chain   | 0.0032 | 0.320            |
| 35  | THBS4     | Thrombospondin-4                                      | 0.0037 | 0.371            | 35  | FTL       | Ferritin light chain                                  | 0.0029 | 0.290            |
| 36  | ECM1      | ECM1 protein                                          | 0.0036 | 0.366            | 36  | GPX3      | Glutathione peroxidase 3                              | 0.0028 | 0.281            |
| 37  | GPX3      | Glutathione peroxidase 3                              | 0.0034 | 0.340            | 37  | YWHAE     | 14-3-3 protein epsilon                                | 0.0025 | 0.253            |
| 38  | TLN1      | Talin 1                                               | 0.0033 | 0.337            | 38  | TUBA4A    | Tubulin alpha-4A chain                                | 0.0025 | 0.247            |
| 39  | FETUB     | Fetuin-B                                              | 0.0033 | 0.333            | 39  | C4A       | Uncharacterized protein                               | 0.0022 | 0.223            |
| 40  | FGG       | FGG protein                                           | 0.0029 | 0.292            | 40  | I7CT57    | Vitamin D binding protein                             | 0.0022 | 0.222            |
| 41  | Q9TS74    | Pancreatic elastase inhibitor                         | 0.0029 | 0.289            | 41  | TLN1      | Talin 1                                               | 0.0022 | 0.217            |
| 42  | C1QTNF3   | Adiponectin M                                         | 0.0028 | 0.283            | 42  | ACTC1     | Actin. alpha cardiac muscle 1                         | 0.0021 | 0.216            |
| 43  | CLU       | Clusterin                                             | 0.0028 | 0.281            | 43  | A1BG      | Alpha-1B-glycoprotein                                 | 0.0020 | 0.198            |
| 44  | SPP2      | Secreted phosphoprotein 24                            | 0.0026 | 0.265            | 44  | ANGPTL3   | Angiopoietin-like 3                                   | 0.0019 | 0.192            |
| 45  | F13B      | Coagulation factor XIII B chain                       | 0.0026 | 0.263            | 45  | C1R       | Complement C1r                                        | 0.0019 | 0.187            |
| 46  | BLVRB     | Flavin reductase (NADPH)                              | 0.0025 | 0.251            | 46  | P02081    | Hemoglobin fetal subunit beta                         | 0.0018 | 0.185            |
| 47  | CDS5L     | CD5 molecule like                                     | 0.0024 | 0.241            | 47  | PSMA7     | Proteasome subunit alpha type-7                       | 0.0018 | 0.184            |
| 48  | FGB       | Fibrinogen beta chain                                 | 0.0023 | 0.233            | 48  | C1S       | Complement C1s subcomponent                           | 0.0017 | 0.173            |
| 49  | TUBA4A    | Tubulin alpha-4A chain                                | 0.0023 | 0.230            | 49  | Q9TS74    | Pancreatic elastase inhibitor                         | 0.0017 | 0.168            |
| 50  | TTR       | Transthyretin                                         | 0.0020 | 0.205            | 50  | APOD      | Apolipoprotein D                                      | 0.0016 | 0.160            |

| CD3 | Gene name | Protein name                                          | RiBAQ  | Contribution (%) | CD4 | Gene name | Protein name                                     | RiBAQ  | Contribution (%) |
|-----|-----------|-------------------------------------------------------|--------|------------------|-----|-----------|--------------------------------------------------|--------|------------------|
| 1   | VTN       | Vitronectin                                           | 0.0824 | 8.343            | 1   | HBA       | Hemoglobin subunit alpha                         | 0.1601 | 16.169           |
| 2   | AHSG      | Alpha-2-HS-glycoprotein                               | 0.0728 | 7.371            | 2   | AHSG      | Alpha-2-HS-glycoprotein                          | 0.1045 | 10.550           |
| 3   | LGALS3BP  | Galectin-3-binding protein                            | 0.0630 | 6.377            | 3   | SERPINF1  | Pigment epithelium-derived factor                | 0.0909 | 9.182            |
| 4   | HBA       | Hemoglobin subunit alpha                              | 0.0527 | 5.341            | 4   | G3NOS9    | Uncharacterized protein                          | 0.0378 | 3.817            |
| 5   | SERPINA1  | Alpha-1-antiproteinase                                | 0.0474 | 4.795            | 5   | CLEC3B    | Tetranectin (TN)                                 | 0.0352 | 3.550            |
| 6   | KIF12     | Protein AMBP                                          | 0.0350 | 3.540            | 6   | SERPINA1  | Alpha-1-antiproteinase                           | 0.0304 | 3.069            |
| 7   | A2M       | Alpha-2-macroglobulin                                 | 0.0302 | 3.056            | 7   | GAPDH     | Glyceraldehyde-3-phosphate dehydrogenase (GAPDH) | 0.0289 | 2.923            |
| 8   | TUBB1     | Tubulin beta chain                                    | 0.0287 | 2.907            | 8   | APOA1     | Apolipoprotein A-I                               | 0.0288 | 2.905            |
| 9   | ITIH3     | Inter-alpha-trypsin inhibitor heavy chain H3          | 0.0246 | 2.491            | 9   | APOE      | Apolipoprotein E                                 | 0.0269 | 2.717            |
| 10  | APOA1     | Apolipoprotein A-I                                    | 0.0192 | 1.939            | 10  | SERPINC1  | Antithrombin-III                                 | 0.0216 | 2.178            |
| 11  | FBLN1     | Fibulin-1                                             | 0.0191 | 1.935            | 11  | APOA2     | Apolipoprotein A-II                              | 0.0184 | 1.857            |
| 12  | ADIPOQ    | Adiponectin                                           | 0.0182 | 1.847            | 12  | C1QA      | Complement C1q subcomponent subunit A            | 0.0171 | 1.729            |
| 13  | CLEC11A   | C-type lectin domain containing 11A                   | 0.0179 | 1.813            | 13  | ALB       | ALB protein                                      | 0.0154 | 1.557            |
| 14  | SERPINC1  | Antithrombin-III                                      | 0.0173 | 1.755            | 14  | CFB       | Complement factor B                              | 0.0141 | 1.425            |
| 15  | G5E5T5    | Uncharacterized protein                               | 0.0154 | 1.559            | 15  | APOC2     | Apolipoprotein C-II                              | 0.0137 | 1.387            |
| 16  | G3NOS9    | Uncharacterized protein                               | 0.0148 | 1.498            | 16  | VTN       | Vitronectin                                      | 0.0136 | 1.370            |
| 17  | APOE      | Apolipoprotein E                                      | 0.0132 | 1.337            | 17  | ALB       | Serum albumin                                    | 0.0117 | 1.177            |
| 18  | GAPDH     | Glyceraldehyde-3-phosphate dehydrogenase (GAPDH)      | 0.0131 | 1.326            | 18  | CFP       | Complement factor properdin                      | 0.0112 | 1.133            |
| 19  | ALB       | ALB protein                                           | 0.0129 | 1.307            | 19  | C1QB      | Complement C1q subcomponent subunit B            | 0.0110 | 1.112            |
| 20  | F2        | Prothrombin                                           | 0.0123 | 1.249            | 20  | P02081    | Hemoglobin fetal subunit beta                    | 0.0106 | 1.068            |
| 21  | HSP90AA1  | Heat shock protein HSP 90-alpha                       | 0.0119 | 1.208            | 21  | F2        | Prothrombin                                      | 0.0104 | 1.050            |
| 22  | APOA2     | Apolipoprotein A-II                                   | 0.0107 | 1.085            | 22  | F13A1     | Coagulation factor XIII A chain                  | 0.0098 | 0.987            |
| 23  | FETUB     | Fetuin-B                                              | 0.0100 | 1.017            | 23  | C1QC      | C1QC protein                                     | 0.0096 | 0.973            |
| 24  | F13A1     | Coagulation factor XIII A chain                       | 0.0097 | 0.981            | 24  | G5E5T5    | Uncharacterized protein                          | 0.0079 | 0.797            |
| 25  | GPX3      | Glutathione peroxidase 3                              | 0.0094 | 0.949            | 25  | Q9TS74    | Pancreatic elastase inhibitor                    | 0.0074 | 0.746            |
| 26  | ALB       | Serum albumin                                         | 0.0093 | 0.947            | 26  | APOB      | Apolipoprotein B                                 | 0.0073 | 0.740            |
| 27  | P02081    | Hemoglobin fetal subunit beta                         | 0.0086 | 0.867            | 27  | SERPINA5  | Plasma serine protease inhibitor                 | 0.0068 | 0.690            |
| 28  | G5E513    | Uncharacterized protein                               | 0.0083 | 0.837            | 28  | TUBB1     | Tubulin beta chain                               | 0.0066 | 0.671            |
| 29  | TUBA4A    | Tubulin alpha-4A chain                                | 0.0072 | 0.733            | 29  | PCOLCE    | Procollagen C-endopeptidase enhancer             | 0.0059 | 0.594            |
| 30  | LOC506828 | Uncharacterized protein                               | 0.0071 | 0.724            | 30  | ECM1      | ECM1 protein                                     | 0.0055 | 0.552            |
| 31  | AFP       | Alpha-fetoprotein                                     | 0.0066 | 0.670            | 31  | FGG       | FGG protein                                      | 0.0055 | 0.551            |
| 32  | APOB      | Apolipoprotein B                                      | 0.0066 | 0.665            | 32  | C9        | Complement component C9                          | 0.0053 | 0.533            |
| 33  | SERPINF2  | Alpha-2-antiplasmin                                   | 0.0060 | 0.603            | 33  | G5E513    | Uncharacterized protein                          | 0.0046 | 0.465            |
| 34  | SERPIND1  | SERPIND1 protein                                      | 0.0055 | 0.557            | 34  | FGB       | Fibrinogen beta chain                            | 0.0041 | 0.417            |
| 35  | CLU       | Clusterin                                             | 0.0049 | 0.494            | 35  | CRP       | Pentaxin                                         | 0.0038 | 0.386            |
| 36  | ECM1      | ECM1 protein                                          | 0.0048 | 0.490            | 36  | KIF12     | Protein AMBP                                     | 0.0038 | 0.386            |
| 37  | SPP2      | Secreted phosphoprotein 24                            | 0.0048 | 0.490            | 37  | C4A       | Uncharacterized protein                          | 0.0038 | 0.379            |
| 38  | C9        | Complement component C9                               | 0.0048 | 0.482            | 38  | LDHA      | L-lactate dehydrogenase A chain                  | 0.0037 | 0.370            |
| 39  | C4A       | Uncharacterized protein                               | 0.0047 | 0.478            | 39  | MYH9      | Myosin heavy chain 9                             | 0.0033 | 0.338            |
| 40  | E1BI02    | Fibromodulin                                          | 0.0044 | 0.447            | 40  | AFP       | Alpha-fetoprotein                                | 0.0033 | 0.336            |
| 41  | ACAN      | Aggrecan core protein                                 | 0.0043 | 0.439            | 41  | PLTP      | Phospholipid transfer protein                    | 0.0032 | 0.326            |
| 42  | FTL       | Ferritin light chain                                  | 0.0043 | 0.434            | 42  | CAT       | Catalase                                         | 0.0032 | 0.320            |
| 43  | SRGN      | Proteoglycan 1-like                                   | 0.0039 | 0.398            | 43  | ITIH3     | Inter-alpha-trypsin inhibitor heavy chain H3     | 0.0030 | 0.307            |
| 44  | FGG       | FGG protein                                           | 0.0038 | 0.380            | 44  | LDHB      | L-lactate dehydrogenase B chain                  | 0.0029 | 0.289            |
| 45  | ACTN1     | Alpha-actinin-1                                       | 0.0037 | 0.378            | 45  | CHAD      | Chondroadherin                                   | 0.0028 | 0.287            |
| 46  | CHST3     | Sulfotransferase                                      | 0.0037 | 0.372            | 46  | AHCY      | Adenosylhomocysteinase                           | 0.0027 | 0.273            |
| 47  | TGFBI     | Transforming growth factor-beta-induced protein ig-h3 | 0.0036 | 0.361            | 47  | A2M       | Alpha-2-macroglobulin                            | 0.0027 | 0.272            |
| 48  | MYH9      | Myosin heavy chain 9                                  | 0.0034 | 0.349            | 48  | RAN       | GTP-binding nuclear protein Ran                  | 0.0026 | 0.264            |
| 49  | A1BG      | Alpha-1B-glycoprotein                                 | 0.0034 | 0.346            | 49  | FGA       | Fibrinogen alpha chain                           | 0.0025 | 0.254            |
| 50  | TUBB5     | Tubulin beta-5 chain                                  | 0.0032 | 0.323            | 50  | Q28194    | Thrombospondin-1                                 | 0.0025 | 0.253            |

**Table S2.** Key corona proteins showing negative or positive correlation with CD cell uptake. The correlation analysis was carried out with the 4 CDs, or with CD2, CD3 and CD4 only.

|                      | Protein  | Analysis with the 4 CDs <sup>a</sup> | Analysis with CD2, CD3 and CD4 <sup>a</sup> |                      | Protein  | Analysis with the 4 CDs <sup>a</sup> | Analysis with CD2, CD3 and CD4 <sup>a</sup> |
|----------------------|----------|--------------------------------------|---------------------------------------------|----------------------|----------|--------------------------------------|---------------------------------------------|
| Negative correlation | FGA      | -0.91                                | -1.00                                       | Positive correlation | ADIPOQ   | 1.00                                 | 1.00                                        |
|                      | FGG      | -0.91                                | -0.95                                       |                      | GC       | 0.99                                 | 1.00                                        |
|                      | C4A      | -0.89                                | -0.89                                       |                      | TTR      | 0.99                                 | 0.99                                        |
|                      | FGB      | -0.87                                | -0.92                                       |                      | ACTC1    | 0.98                                 | 1.00                                        |
|                      | RAN      | -0.87                                | -0.98                                       |                      | I7CT57   | 0.90                                 | 0.96                                        |
|                      | SERPINC1 | -0.76                                | -0.78                                       |                      | FBLN1    | 0.81                                 | 0.97                                        |
|                      | P02081   | -0.74                                | -0.99                                       |                      | YWHAE    | 0.81                                 | 0.92                                        |
|                      | APOB     | -0.74                                | -1.00                                       |                      | C4BPA    | 0.77                                 | 0.93                                        |
|                      | C9       | -0.72                                | -1.00                                       |                      | PSMA7    | 0.69                                 | 0.84                                        |
|                      | MYH9     | -0.72                                | -0.99                                       |                      | SERPINF2 | 0.68                                 | 0.70                                        |
|                      | GAPDH    | -0.71                                | -0.79                                       |                      | FETUB    | 0.68                                 | 0.71                                        |
|                      | F13A1    | -0.68                                | -1.00                                       |                      | ITIH2    | 0.65                                 | 0.88                                        |
|                      | HBA      | -0.68                                | -0.77                                       |                      | RBP4     | 0.62                                 | 0.74                                        |
|                      | AHCY     | -0.67                                | -0.75                                       |                      | F2       | 0.61                                 | 1.00                                        |
|                      | SERPINA5 | -0.61                                | -0.69                                       |                      | ANGPTL3  | 0.60                                 | 0.77                                        |
|                      | LDHB     | -0.57                                | -0.70                                       |                      | KIF12    | 0.53                                 | 0.96                                        |
|                      | LDHA     | -0.57                                | -0.70                                       |                      | AFP      | 0.53                                 | 0.64                                        |
|                      | Q9TS74   | -0.56                                | -0.56                                       |                      | AHSG     | 0.52                                 | 0.74                                        |
|                      | APOC2    | -0.56                                | -0.69                                       |                      | TGFBI    | 0.42                                 | 0.69                                        |
|                      | C1QC     | -0.55                                | -0.66                                       |                      | VTN      | 0.42                                 | 0.64                                        |
|                      | ALB      | -0.54                                | -0.97                                       |                      | ITIH3    | 0.40                                 | 0.98                                        |
|                      | CFB      | -0.53                                | -0.64                                       |                      | TLN1     | 0.26                                 | 0.66                                        |
|                      | C1QA     | -0.53                                | -0.63                                       |                      |          |                                      |                                             |
|                      | PLTP     | -0.52                                | -0.66                                       |                      |          |                                      |                                             |
|                      | C1QB     | -0.52                                | -0.61                                       |                      |          |                                      |                                             |
|                      | CAT      | -0.50                                | -0.60                                       |                      |          |                                      |                                             |
|                      | APOA1    | -0.50                                | -0.62                                       |                      |          |                                      |                                             |
|                      | G5E5T5   | -0.50                                | -0.51                                       |                      |          |                                      |                                             |
|                      | CFP      | -0.49                                | -0.58                                       |                      |          |                                      |                                             |
|                      | G5E513   | -0.48                                | -0.53                                       |                      |          |                                      |                                             |
|                      | Q28194   | -0.48                                | -0.56                                       |                      |          |                                      |                                             |
|                      | SERPINF1 | -0.48                                | -0.57                                       |                      |          |                                      |                                             |
|                      | CLEC3B   | -0.48                                | -0.56                                       |                      |          |                                      |                                             |
|                      | PCOLCE   | -0.47                                | -0.56                                       |                      |          |                                      |                                             |
|                      | CRP      | -0.47                                | -0.56                                       |                      |          |                                      |                                             |
|                      | CHAD     | -0.47                                | -0.56                                       |                      |          |                                      |                                             |
| ECM1                 | -0.40    | -0.87                                |                                             |                      |          |                                      |                                             |
| C1QTNF3              | -0.39    | -1.00                                |                                             |                      |          |                                      |                                             |
| F13B                 | -0.15    | -0.98                                |                                             |                      |          |                                      |                                             |

<sup>a</sup>) Pearson *r* correlation coefficient calculated from FACS data for cells exposed to CDs. The uptake correlation coefficient was considered as significant when the absolute value was > 0.5.
